# Supplementary material for: Induction of Wnt signaling antagonists and p21-activated kinase enhances cardiomyocyte proliferation during zebrafish heart regeneration
Source: PubMed Central journal article supplement — J Mol Cell Biol. 2020 Sep 16;13(1):41–58. doi: 10.1093/jmcb/mjaa046 (PMC8035995; doi:10.1093/jmcb/mjaa046), 2020-09-16
Supplement: mjaa046_supplementary_data.pdf [file mjaa046_supplementary_data.pdf]

## Supplementary material

### Induction of Wnt signaling antagonists and P21-activated kinase enhances cardiomyocyte proliferation during zebrafish heart regeneration

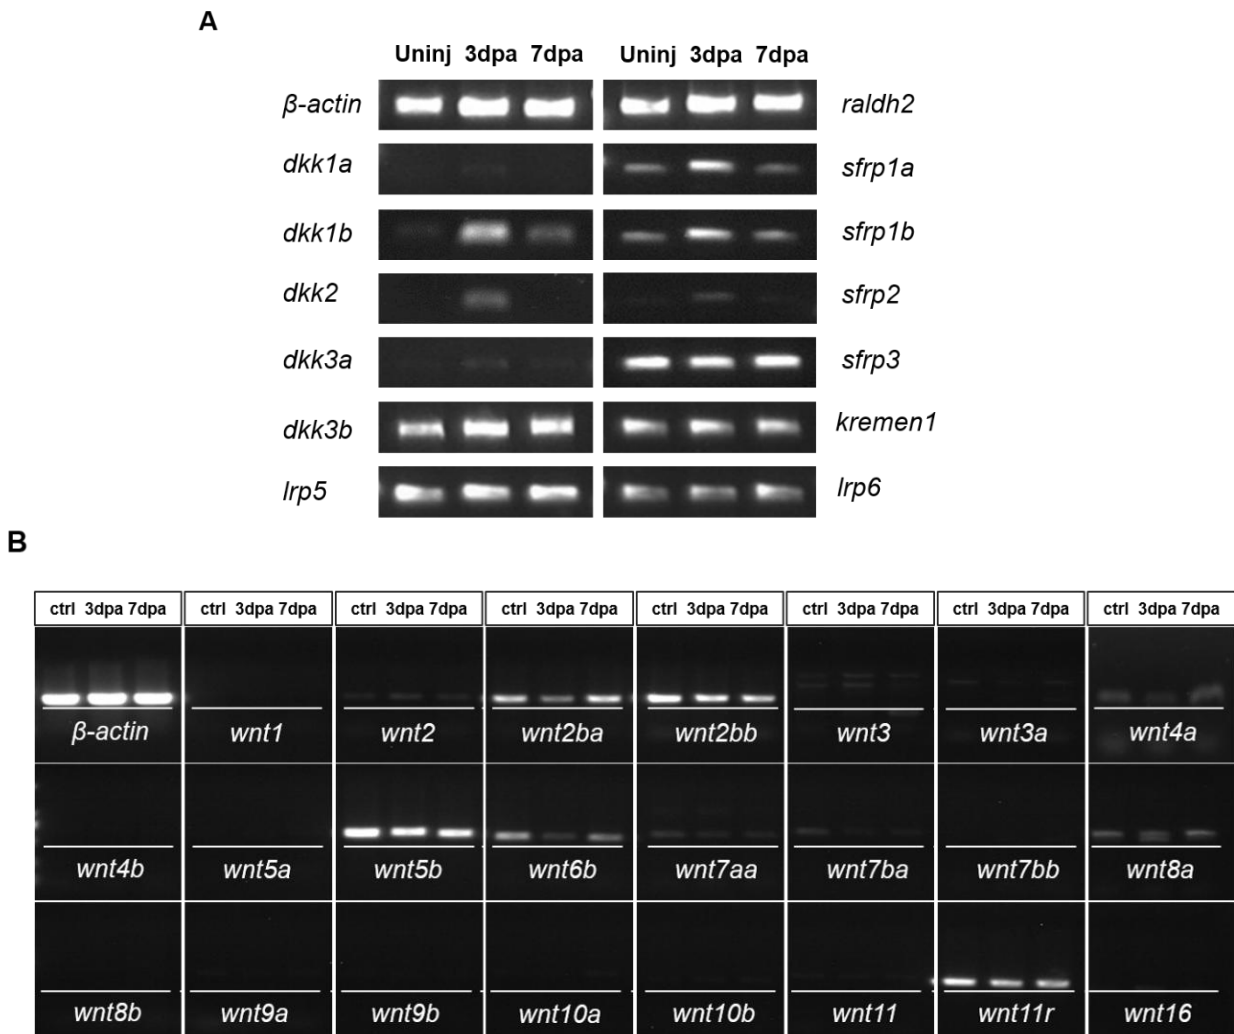

**Supplementary Figure S1 Expression of Wnt inhibitors and Wnt ligands during cardiac regeneration by RT-PCR analyses.** (A) Expression of Wnt inhibitor genes, *dkk1a*, *dkk1b*, *dkk2*, *dkk3a*, *dkk3b*, *sfrp1a*, *sfrp1b*, *sfrp2*, *sfrp3*; Wnt receptor genes, *kremen1*, *lrp5*, *lrp6* were analyzed using semi-quantitative RT-PCR analyses. (B) Wnt ligands, including *wnt1*, *wnt2*, *wnt2ba*, *wnt2bb*, *wnt3*, *wnt3a*, *wnt4a*, *wnt4b*, *wnt5a*, *wnt5b*, *wnt6b*, *wnt7aa*, *wnt7ba*, *wnt7bb*, *wnt8a*, *wnt8b*, *wnt9a*, *wnt9b*, *wnt10a*, *wnt10b*, *wnt11*, *wnt11r*, *wnt16* were analyzed using semi-quantitative RT-PCR analyses. mRNAs were isolated from uninjured and amputated hearts at 3 days and 7 days.

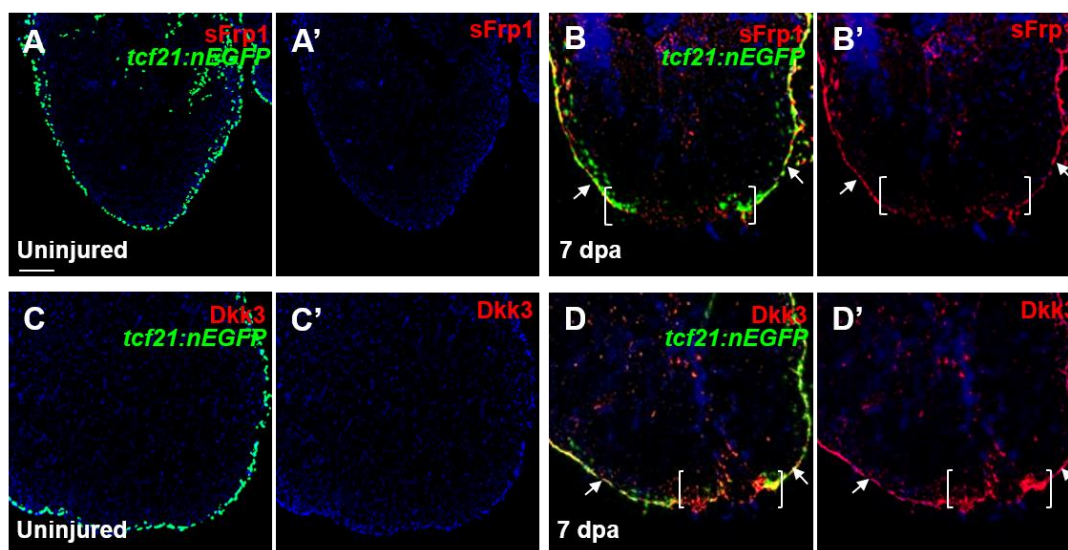

**Supplementary Figure S2 Dkk3 and sFrp1 are induced in epicardium during heart regeneration.** (A-D) Representative confocal images of heart sections from uninjured and 7 dpa *Tg(tcf21:nEGFP)* animal co-stained with antibodies for GFP (green) and sFrp1 (red) or Dkk3 (red). Arrows point to sFrp1<sup>+</sup> epicardium (B and B') or Dkk3<sup>+</sup> epicardium (D and D'). A', B', C', and D' are separate channels of A, B, C and D, respectively. Brackets indicate amputation plane. Scale bars: 100  $\mu$ m.

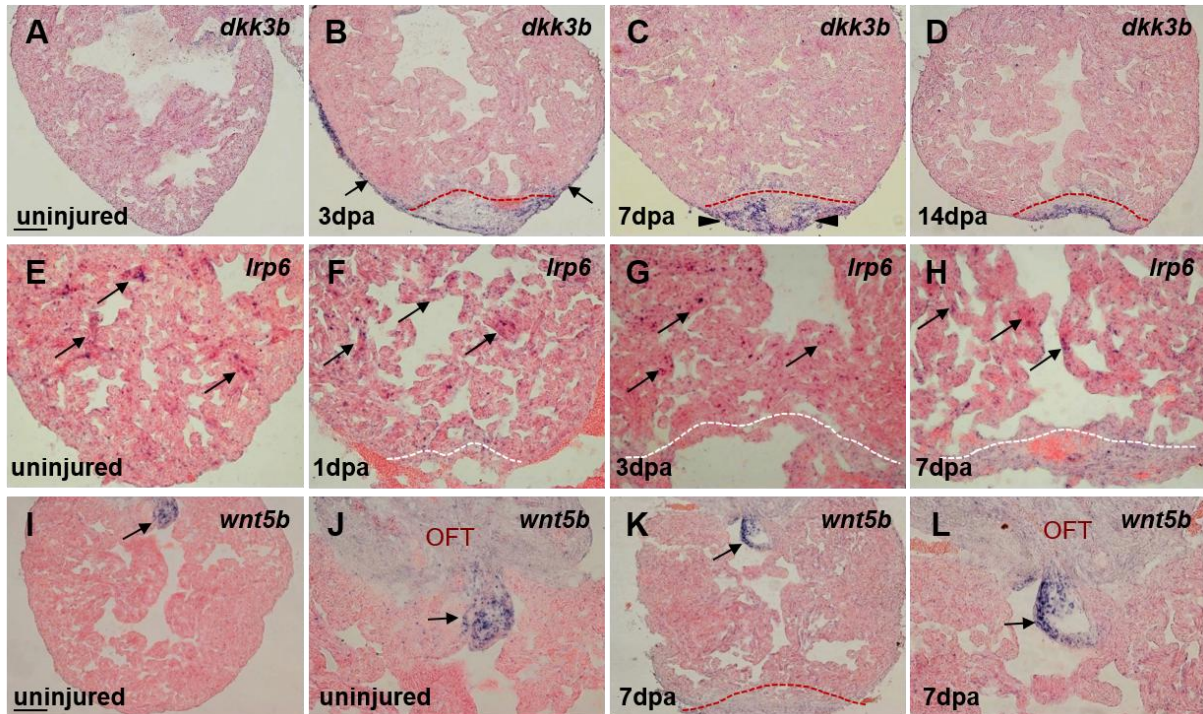

**Supplementary Figure S3 Expression of *dkk3b*, *lrp6* and *wnt5b* during heart regeneration by *in situ* hybridization analyses.** (A-D) While the uninjured ventricle shows no *dkk3b* expression, epicardial cells induce *dkk3b* expression (arrows) at 3 dpa. *dkk3b* expression is detectable in the regenerate (arrowheads) at 7 dpa, and *dkk3b* expression remains in the epicardial sheet enclosing the wound by 14 dpa. (E-H) ISH analyses reveal expression of *lrp6* (arrows) in myocardium in uninjured hearts, 1 dpa, 3 dpa and 7 dpa hearts. (I-L) *wnt5b* is expressed at the junctional region between the ventricle and the outflow tract (OFT) in uninjured hearts (arrow in J and L); Following resection at 7 dpa, *wnt5b* expression remains unaltered (arrow in K and L). Dotted line indicates amputation plane. Scale bars: 100  $\mu$ m (A-L).

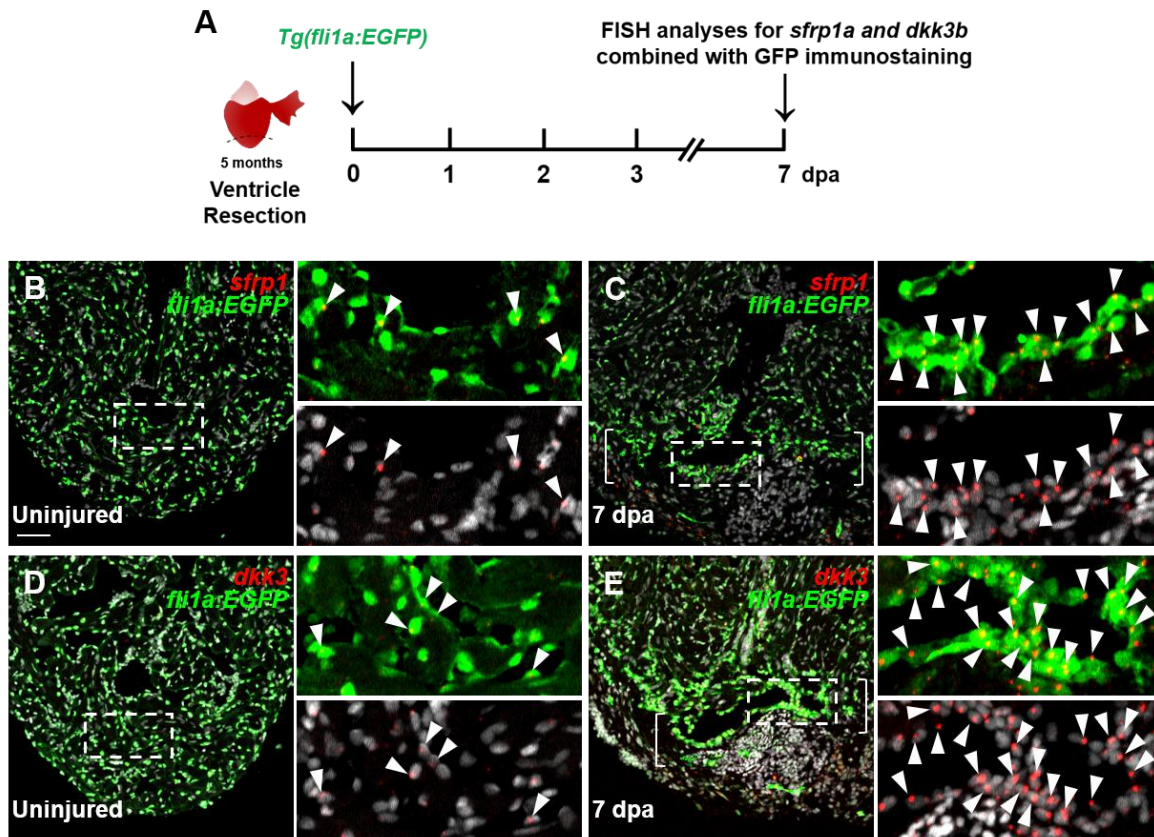

**Supplementary Figure S4** *dkk3b* and *sfrp1* transcripts are induced in endocardium during heart regeneration. (A-D) Schematic of experimental procedures for FISH analyses combined with GFP immunostaining. (B-E) Representative images of FISH of *sfrp1* (B and C, red) or *dkk3* (D and E, red) combined with immunofluorescence for GFP on heart sections from uninjured and 7 dpa *Tg(fli1a:EGFP)* animal. Boxed regions are magnified in adjacent right panels. Arrowheads point to *sfrp1*<sup>+</sup>*Fli1a*<sup>+</sup> endocardial cells or *dkk3*<sup>+</sup>*Fli1a*<sup>+</sup> endocardial cells. Brackets indicate amputation plane. Scale bars: 100 μm.

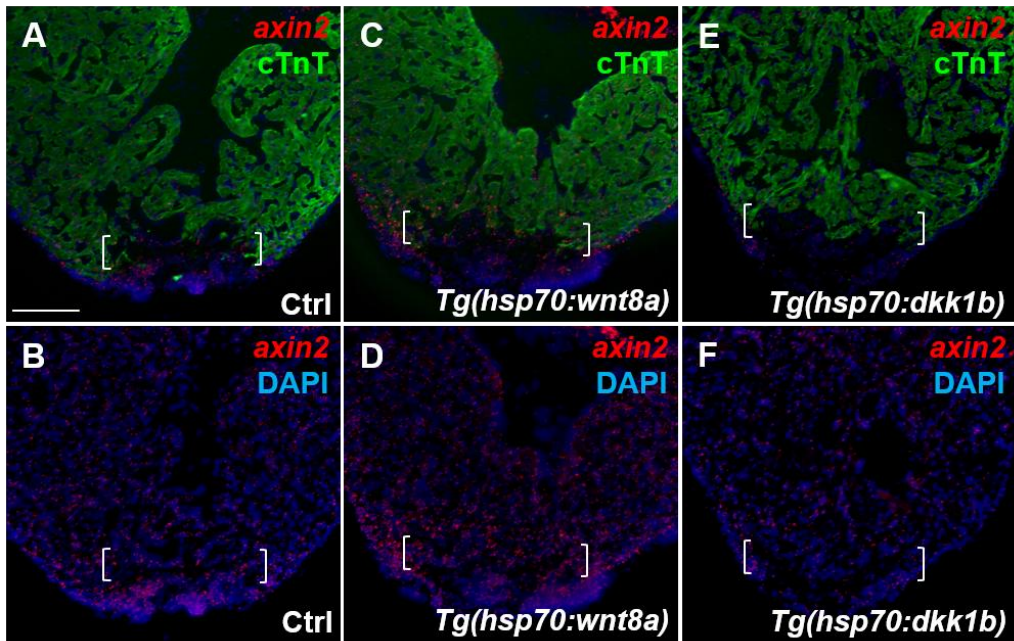

**Supplementary Figure S5 Increased or reduced Wnt pathway activity in *Tg(hsp70:wnt8a)* or *Tg(hsp70:dkk1b)* hearts following ventricular resection by *axin2* RNAscope analyses, respectively.** (A-F) RNAscope analyses showing *axin2* expression in control, *Tg(hsp70:dkk1b)* and *Tg(hsp70:wnt8a)* hearts following ventricular resection at 7 dpa. *axin2* transcripts are detectable in the injured heart and slightly enriched at the injury region (A and B). *axin2* expression is upregulated in *wnt8a*-overexpressing hearts in heat shocked *Tg(hsp70:wnt8a)* animals (C and D), but reduced in *dkk1b*-overexpressing hearts in *Tg(hsp70:dkk1b)* zebrafish (E and F), when compared with control animals (A and B). Brackets indicate amputation plane. Scale bars: 100  $\mu$ m.

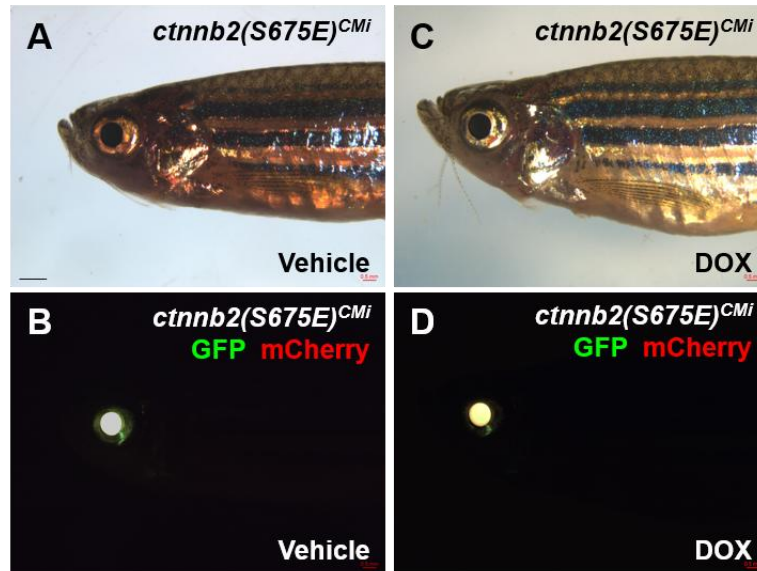

**Supplementary Figure S6 Identification of *ctnnb2(S675E)<sup>CMi</sup>* transgenic zebrafish using lens-expressed fluorescent proteins. (A-D) Adult transgenic *ctnnb2(S675E)<sup>CMi</sup>* zebrafish showed the selectable markers of yellow lens (overlap of GFP with mCherry). No mScarlet-I fluorescence were observed in zebrafish muscle, skin or fin upon DOX or vehicle treatment. Scale bars: 250  $\mu$ m.**

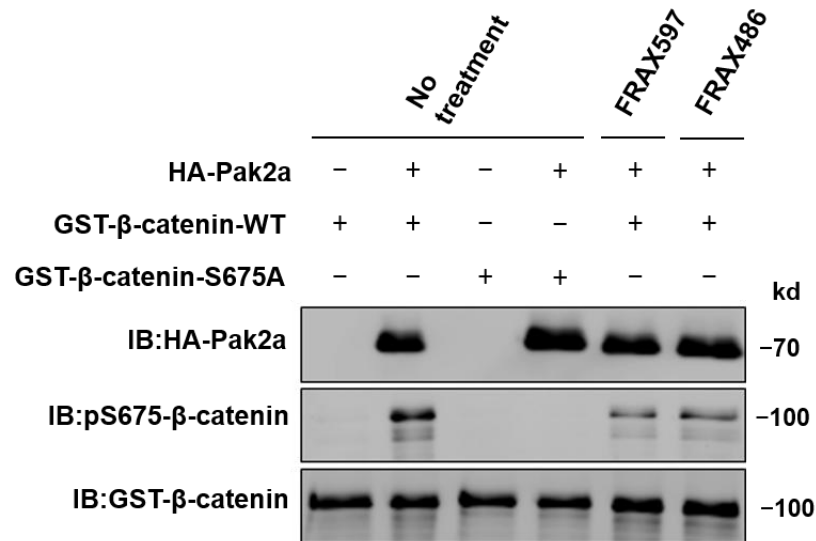

**Supplementary Figure S7 Pak2a kinase phosphorylates zebrafish  $\beta$ -catenin at the Ser675 residue in cells.** Kinase phosphorylation assay shows that Ser675 residue of  $\beta$ -catenin is phosphorylated by zebrafish Pak2a, but completely abrogated by  $\beta$ -catenin S675A mutant. Administration of FRAX597 or FRAX486 reduces the Ser675 phosphorylation of  $\beta$ -catenin. The immunoprecipitated HA-Pak2 was subjected to kinase assay in the presence of 500  $\mu$ M ATP and 1.5  $\mu$ g of zebrafish GST-tagged WT or S675A- $\beta$ -catenin purified from *Escherichia coli* as substrates. 2  $\mu$ M Pak2 inhibitor FRAX597 or FRAX486 was added to the reaction mixtures by incubating for 60 min. The reactions were subjected to analysis by SDS-PAGE with related antibodies.

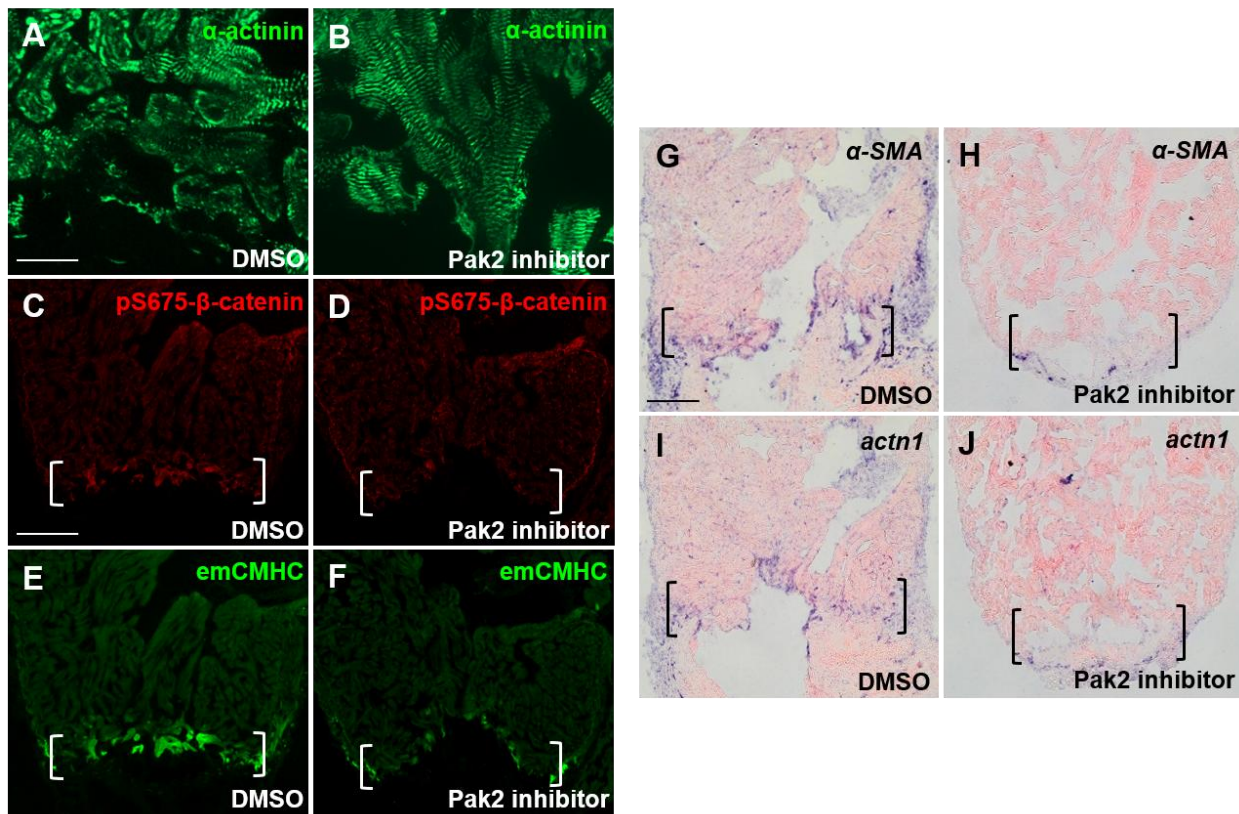

**Supplementary Figure S8 Inhibition of Pak2 activity attenuates injury-induced CM dedifferentiation.** (A and B) Confocal high magnification image analyses exhibiting disassembled sarcomeres in DMSO-treated hearts (A), and relatively normal striated sarcomeres in FRAX597-treated hearts (B). (C-F) Separate fluorescence channel analyses revealing the reduction of pS675-β-catenin levels (D) and emCMHC expression (F) at injured myocardial cell edges in FRAX597-treated hearts, compared to DMSO-treated hearts (C and E). (G-J) ISH analyses display a reduction of  $\alpha$ -SMA (H) and *actn1* (J) expression at wound edges in FRAX597-treated hearts, compared to that in DMSO-treated hearts (G and I) at 7 dpa. 1  $\mu$ M FRAX597 treatment from 4 to 6 dpa. Scale bars: 10  $\mu$ m (A-B), 100  $\mu$ m (C-J).
